# Supplementary material for: The fecal, oral, and skin microbiota of children with Chagas disease treated with benznidazole
Source: PubMed Central journal article supplement (PMC6391005; doi:10.1371/journal.pone.0212593), 2019-02-26
Supplement: pone.0212593.s001.pdf [file pone.0212593.s001.pdf]

STROBE Statement—Checklist of items that should be included in reports of *case-control studies*

|                              | <b>Item No</b> | <b>Recommendation</b>                                                                                                                                                                                                                                                                                                                                                                                                                                   |
|------------------------------|----------------|---------------------------------------------------------------------------------------------------------------------------------------------------------------------------------------------------------------------------------------------------------------------------------------------------------------------------------------------------------------------------------------------------------------------------------------------------------|
| <b>Title and abstract</b>    | 1              | (a) Indicate the study's design with a commonly used term in the title or the abstract<br><b>Done. Abstract, paragraph 2.</b><br>(b) Provide in the abstract an informative and balanced summary of what was done and what was found<br><b>Done in the Abstract</b>                                                                                                                                                                                     |
| <b>Introduction</b>          |                |                                                                                                                                                                                                                                                                                                                                                                                                                                                         |
| Background/rationale         | 2              | Explain the scientific background and rationale for the investigation being reported<br><b>Done. background, lines 42-46.</b>                                                                                                                                                                                                                                                                                                                           |
| Objectives                   | 3              | State specific objectives, including any prespecified hypotheses<br><b>Done. Lines 72-83, Author Summary.</b>                                                                                                                                                                                                                                                                                                                                           |
| <b>Methods</b>               |                |                                                                                                                                                                                                                                                                                                                                                                                                                                                         |
| Study design                 | 4              | Present key elements of study design early in the paper<br><b>Done. Methods, paragraph 2, "Sample collection".</b>                                                                                                                                                                                                                                                                                                                                      |
| Setting                      | 5              | Describe the setting, locations, and relevant dates, including periods of recruitment, exposure, follow-up, and data collection<br><b>Done, methods, Paragraph 1.</b>                                                                                                                                                                                                                                                                                   |
| Participants                 | 6              | (a) Give the eligibility criteria, and the sources and methods of case ascertainment and control selection. Give the rationale for the choice of cases and controls<br><b>Done, methods, Paragraph 1.</b><br>(b) For matched studies, give matching criteria and the number of controls per case<br><b>Done</b>                                                                                                                                         |
| Variables                    | 7              | Clearly define all outcomes, exposures, predictors, potential confounders, and effect modifiers. Give diagnostic criteria, if applicable<br><b>Done, methods, Paragraph 2.</b>                                                                                                                                                                                                                                                                          |
| Data sources/<br>measurement | 8*             | For each variable of interest, give sources of data and details of methods of assessment (measurement). Describe comparability of assessment methods if there is more than one group<br><b>Done, methods, Paragraph 3, "16S rRNA gene sequencing and analyses".</b>                                                                                                                                                                                     |
| Bias                         | 9              | Describe any efforts to address potential sources of bias<br><b>Done, Methods, Paragraph 3, "16S rRNA gene sequencing and analyses".</b>                                                                                                                                                                                                                                                                                                                |
| Study size                   | 10             | Explain how the study size was arrived at<br><b>Done, Methods, Paragraph 1, "Ethics".</b>                                                                                                                                                                                                                                                                                                                                                               |
| Quantitative variables       | 11             | Explain how quantitative variables were handled in the analyses. If applicable, describe which groupings were chosen and why<br><b>Done, Methods, Paragraph 2</b>                                                                                                                                                                                                                                                                                       |
| Statistical methods          | 12             | (a) Describe all statistical methods, including those used to control for confounding<br><b>Done</b><br>(b) Describe any methods used to examine subgroups and interactions<br><b>Done, Methods, Paragraph 2</b><br>(c) Explain how missing data were addressed<br><b>We did not have missing data</b><br>(d) If applicable, explain how matching of cases and controls was addressed<br><b>Not applicable</b><br>(e) Describe any sensitivity analyses |

---

**Done, Methods, Paragraph 3, "16S rRNA gene sequencing and analyses".**

---

| <b>Results</b>           |     |                                                                                                                                                                                                                                                                                                                                                                                                                                                                                                               |
|--------------------------|-----|---------------------------------------------------------------------------------------------------------------------------------------------------------------------------------------------------------------------------------------------------------------------------------------------------------------------------------------------------------------------------------------------------------------------------------------------------------------------------------------------------------------|
| Participants             | 13* | (a) Report numbers of individuals at each stage of study—eg numbers potentially eligible, examined for eligibility, confirmed eligible, included in the study, completing follow-up, and analysed<br><b>Done. Results, paragraph 2.</b><br>(b) Give reasons for non-participation at each stage<br><b>Not applicable.</b><br>(c) Consider use of a flow diagram<br><b>Done. Supplementary Figure 1.</b>                                                                                                       |
| Descriptive data         | 14* | (a) Give characteristics of study participants (eg demographic, clinical, social) and information on exposures and potential confounders<br><b>Done</b><br>(b) Indicate number of participants with missing data for each variable of interest<br><b>Done</b>                                                                                                                                                                                                                                                 |
| Outcome data             | 15* | Report numbers in each exposure category, or summary measures of exposure<br><b>Done</b>                                                                                                                                                                                                                                                                                                                                                                                                                      |
| Main results             | 16  | (a) Give unadjusted estimates and, if applicable, confounder-adjusted estimates and their precision (eg, 95% confidence interval). Make clear which confounders were adjusted for and why they were included<br><b>Done, results, Paragraph 2 and 4.</b><br>(b) Report category boundaries when continuous variables were categorized<br><b>Not applicable.</b><br>(c) If relevant, consider translating estimates of relative risk into absolute risk for a meaningful time period<br><b>Not applicable.</b> |
| Other analyses           | 17  | Report other analyses done—eg analyses of subgroups and interactions, and sensitivity analyses<br><b>Not applicable.</b>                                                                                                                                                                                                                                                                                                                                                                                      |
| <b>Discussion</b>        |     |                                                                                                                                                                                                                                                                                                                                                                                                                                                                                                               |
| Key results              | 18  | Summarise key results with reference to study objectives<br><b>Done. Discussion, paragraph 1.</b>                                                                                                                                                                                                                                                                                                                                                                                                             |
| Limitations              | 19  | Discuss limitations of the study, taking into account sources of potential bias or imprecision. Discuss both direction and magnitude of any potential bias<br><b>Done. Discussion, paragraph 3.</b>                                                                                                                                                                                                                                                                                                           |
| Interpretation           | 20  | Give a cautious overall interpretation of results considering objectives, limitations, multiplicity of analyses, results from similar studies, and other relevant evidence<br><b>Done along the Discussion section.</b>                                                                                                                                                                                                                                                                                       |
| Generalisability         | 21  | Discuss the generalisability (external validity) of the study results<br><b>Done in Discussion, paragraph 4.</b>                                                                                                                                                                                                                                                                                                                                                                                              |
| <b>Other information</b> |     |                                                                                                                                                                                                                                                                                                                                                                                                                                                                                                               |
| Funding                  | 22  | Give the source of funding and the role of the funders for the present study and, if applicable, for the original study on which the present article is based<br><b>Done in the "Financial Disclosure" section</b>                                                                                                                                                                                                                                                                                            |
