# Supplementary material for: The fecal, oral, and skin microbiota of children with Chagas disease treated with benznidazole
Source: PubMed Central journal article supplement (PMC6391005; doi:10.1371/journal.pone.0212593), 2019-02-26

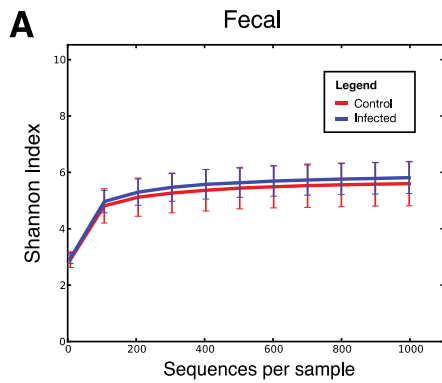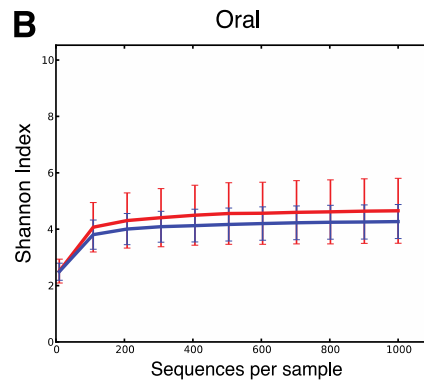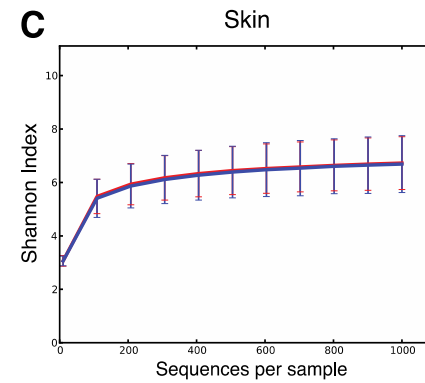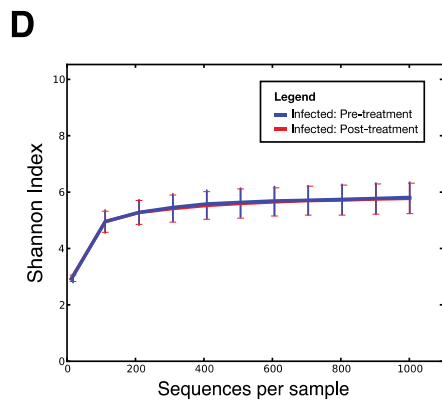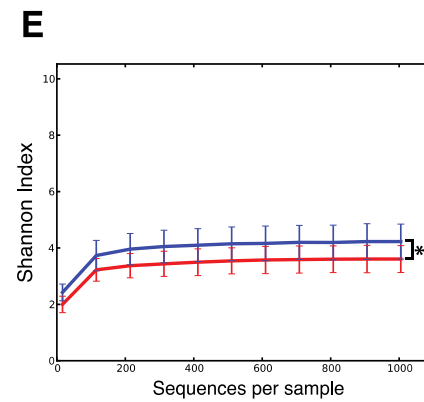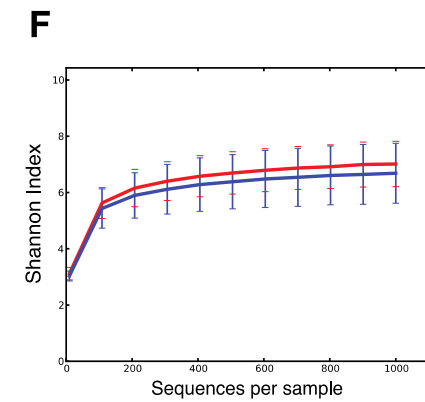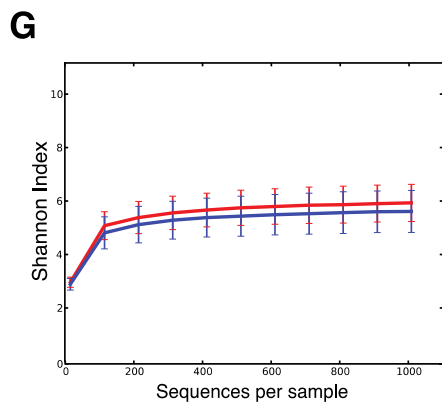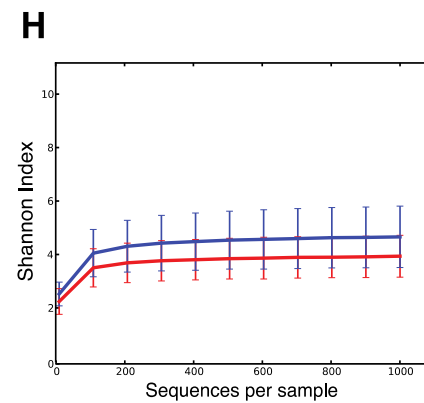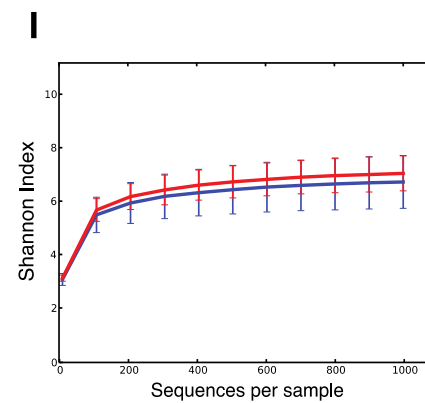

Supplement: pone.0212593.s003.pdf [file pone.0212593.s003.pdf]
